# Supplementary material
Source: MDPI journal article supplement (https://www.mdpi.com/2073-4395/14/1/118)
Supplement: s1 [file s1]

Archive with 2 entries (2 files):
- Text S1.pdf
- Text S2.pdf
