# Supplementary material
Source: MDPI journal article supplement (https://www.mdpi.com/2073-4395/14/1/118)
Supplement: s1 [file s1 › Text S2.pdf]

Text S2: the list of abbreviation

| Number | Abbreviated | Meaning                           |
|--------|-------------|-----------------------------------|
| 1      | Pb          | lead                              |
| 2      | SOD         | superoxide dismutase              |
| 3      | AT          | catalase                          |
| 4      | APX         | ascorbate peroxidase              |
| 5      | POD         | peroxidase                        |
| 6      | GR          | glutathione reductase             |
| 7      | GSH         | glutathione                       |
| 8      | YP          | 30 days-young period              |
| 9      | GP          | 60 days-growth period             |
| 10     | MP          | 90 days-maturity period           |
| 11     | OP          | 120 days-old period               |
| 12     | AP          | 150 days-apoptosis period         |
| 13     | MDA         | malondialdehyde                   |
| 14     | HCAs        | hydroxycinnamic acid              |
| 15     | ROS         | reactive oxygen                   |
| 16     | PSII        | reaction center of photosystem II |
